# Supplementary material
Source: publisher figshare collection journal article supplement (https://rs.figshare.com/ndownloader/files/17984168)
Supplement: Supplementary file 1 [file 17984168]

## Sheet: tableS6_wgcnaOutputSignificant
Gene Name	SwissProt Accession	Protein Annotation
phf24	PHF24_HUMAN	PHD finger protein 24
hdac9	HDAC9_HUMAN	Histone deacetylase 9
LOC106922384	RORB_HUMAN	Nuclear receptor ROR-beta
LOC106922414	CNRG_HUMAN	Retinal rod rhodopsin-sensitive cGMP 3',5'-cyclic phosphodiesterase subunit gamma
LOC106922592	PRPH2_HUMAN	Peripherin-2
slc16a7	MOT2_HUMAN	Monocarboxylate transporter 2
dmxl1	DMXL1_HUMAN	DmX-like protein 1
LOC106923559	CD5R1_HUMAN	Cyclin-dependent kinase 5 activator 1
LOC106923633	CLOCK_HUMAN	Circadian locomotor output cycles protein kaput
LOC106923979	GBG11_HUMAN	Guanine nucleotide-binding protein G(I)/G(S)/G(O) subunit gamma-11
LOC106924058	NCKX2_HUMAN	Sodium/potassium/calcium exchanger 2
pde6a	PDE6A_HUMAN	Rod cGMP-specific 3',5'-cyclic phosphodiesterase subunit alpha
rbp3	RET3_HUMAN	Retinol-binding protein 3
LOC106924466	FAIM1_HUMAN	Fas apoptotic inhibitory molecule 1
guca1a	GUC1A_HUMAN	Guanylyl cyclase-activating protein 1
LOC106924629	VISL1_HUMAN	Visinin-like protein 1
LOC106924800	CLUL1_HUMAN	Clusterin-like protein 1
tmem71	ZN329_HUMAN	Zinc finger protein 329
LOC106925192	RK_HUMAN	Rhodopsin kinase
LOC106925200	H4_HUMAN	Histone H4
LOC106925265	LFG2_HUMAN	Protein lifeguard 2
LOC106925397	GUC1B_HUMAN	Guanylyl cyclase-activating protein 2
LOC106925904	GLIS1_HUMAN	Zinc finger protein GLIS1
fam124a	F124A_HUMAN	Protein FAM124A
march1	MARH1_HUMAN	E3 ubiquitin-protein ligase MARCH1
LOC106926800	CIART_HUMAN	Circadian-associated transcriptional repressor
LOC106927107	RUNX2_HUMAN	Runt-related transcription factor 2
LOC106927164	NCKX2_HUMAN	Sodium/potassium/calcium exchanger 2
mdh1	MDHC_HUMAN	Malate dehydrogenase, cytoplasmic
sympk	SYMPK_HUMAN	Symplekin
paf1	PAF1_HUMAN	RNA polymerase II-associated factor 1 homolog
LOC106928322	INHBB_HUMAN	Inhibin beta B chain
LOC106927440	RN19B_HUMAN	E3 ubiquitin-protein ligase RNF19B
cdr2	CDR2_HUMAN	Cerebellar degeneration-related protein 2
map3k12	M3K12_HUMAN	Mitogen-activated protein kinase kinase kinase 12
LOC106929038	LDHB_HUMAN	L-lactate dehydrogenase B chain
LOC106928871	GALR2_HUMAN	Galanin receptor type 2
LOC106929028	GLNA_HUMAN	Glutamine synthetase
LOC106929229	RET4_HUMAN	Retinol-binding protein 4
LOC106929227	KCNV2_HUMAN	Potassium voltage-gated channel subfamily V member 2
LOC106929251	GUC2D_HUMAN	Retinal guanylyl cyclase 1
arl13a	AR13B_HUMAN	ADP-ribosylation factor-like protein 13B
igsf9b	TUTLB_HUMAN	Protein turtle homolog B
svil	SVIL_HUMAN	Supervillin
rom1	PRPH2_HUMAN	Peripherin-2
LOC106930337	DACT2_HUMAN	Dapper homolog 2
LOC106930547	PER2_HUMAN	Period circadian protein homolog 2
LOC106931170	HIPK3_HUMAN	Homeodomain-interacting protein kinase 3
sertad2	SRTD2_HUMAN	SERTA domain-containing protein 2
LOC106930110	NIM1_HUMAN	Serine/threonine-protein kinase NIM1
kcnb1	KCNB1_HUMAN	Potassium voltage-gated channel subfamily B member 1
rnf111	RN111_HUMAN	E3 ubiquitin-protein ligase Arkadia
opn1sw	OPSB_HUMAN	Short-wave-sensitive opsin 1
ndrg1	NDRG3_HUMAN	Protein NDRG3
LOC106932040	FEZ2_HUMAN	Fasciculation and elongation protein zeta-2
LOC106932115	GUC2F_HUMAN	Retinal guanylyl cyclase 2
kank2	KANK2_HUMAN	KN motif and ankyrin repeat domain-containing protein 2
map1a	MAP1A_HUMAN	Microtubule-associated protein 1A
LOC106933243	CRGB_HUMAN	Gamma-crystallin B
LOC106933251	CRGB_HUMAN	Gamma-crystallin B
LOC106933302	TRI35_HUMAN	Tripartite motif-containing protein 35
LOC106933303	ARRB2_HUMAN	Beta-arrestin-2
vdr	VDR_HUMAN	Vitamin D3 receptor
LOC106933442	CNGB3_HUMAN	Cyclic nucleotide-gated cation channel beta-3
LOC106933670	ABCA4_HUMAN	Retinal-specific ATP-binding cassette transporter
LOC106933725	NLGN2_HUMAN	Neuroligin-2
nme3	NDK3_HUMAN	Nucleoside diphosphate kinase 3
LOC106934251	IQEC2_HUMAN	IQ motif and SEC7 domain-containing protein 2
rnf208	RN208_HUMAN	RING finger protein 208
LOC106904707	LRIT2_HUMAN	Leucine-rich repeat, immunoglobulin-like domain and transmembrane domain-containing protein 2
LOC106904761	OPSG_HUMAN	Medium-wave-sensitive opsin 1
LOC106904912	GBRP_HUMAN	Gamma-aminobutyric acid receptor subunit pi
smpd3	NSMA2_HUMAN	Sphingomyelin phosphodiesterase 3
LOC106905024	OPSD_HUMAN	Rhodopsin
sec24c	SC24D_HUMAN	Protein transport protein Sec24D
LOC106905191	PFKAP_HUMAN	ATP-dependent 6-phosphofructokinase, platelet type
clta	CLCA_HUMAN	Clathrin light chain A
fstl5	FSTL5_HUMAN	Follistatin-related protein 5
LOC106905630	MYT1L_HUMAN	Myelin transcription factor 1-like protein
stox2	STOX2_HUMAN	Storkhead-box protein 2
LOC106906931	KINH_HUMAN	Kinesin-1 heavy chain
LOC106907067	RIC8A_HUMAN	Synembryn-A
LOC106907698	RIC8A_HUMAN	Synembryn-A
LOC106908013	SWAHC_HUMAN	Ankyrin repeat domain-containing protein SOWAHC
pde6d	PDE6D_HUMAN	Retinal rod rhodopsin-sensitive cGMP 3',5'-cyclic phosphodiesterase subunit delta
cpe	CBPE_HUMAN	Carboxypeptidase E
LOC106908697	SOGA1_HUMAN	Protein SOGA1
LOC106908776	GNAO_HUMAN	Guanine nucleotide-binding protein G(o) subunit alpha
cngb1	CNGB1_HUMAN	Cyclic nucleotide-gated cation channel beta-1
bbs1	BBS1_HUMAN	Bardet-Biedl syndrome 1 protein
LOC106909670	VGLU1_HUMAN	Vesicular glutamate transporter 1
LOC106910063	BRD8_HUMAN	Bromodomain-containing protein 8
LOC106910433	ERR3_HUMAN	Estrogen-related receptor gamma
LOC106912535	BNI3L_HUMAN	BCL2/adenovirus E1B 19 kDa protein-interacting protein 3-like
rnf10	RNF10_HUMAN	RING finger protein 10
LOC106910781	H32_HUMAN	Histone H3.2
LOC106910818	RPGR1_HUMAN	X-linked retinitis pigmentosa GTPase regulator-interacting protein 1
LOC106911279	GPSM1_HUMAN	G-protein-signaling modulator 1
ehbp1	EHBP1_HUMAN	EH domain-binding protein 1
pdc	PHOS_HUMAN	Phosducin
LOC106912658	ZN627_HUMAN	Zinc finger protein 627
sall1	SALL1_HUMAN	Sal-like protein 1
hlf	HLF_HUMAN	Hepatic leukemia factor
LOC106914024	CSPG4_HUMAN	Chondroitin sulfate proteoglycan 4
LOC106914298	ARRB1_HUMAN	Beta-arrestin-1
LOC106914324	ABCG1_HUMAN	ATP-binding cassette sub-family G member 1
faxc	FAXC_HUMAN	Failed axon connections homolog
LOC106914639	CDKL5_HUMAN	Cyclin-dependent kinase-like 5
LOC106914663	RP1L1_HUMAN	Retinitis pigmentosa 1-like 1 protein
LOC106914931	ENOA_HUMAN	Alpha-enolase
gfod1	GFOD1_HUMAN	Glucose-fructose oxidoreductase domain-containing protein 1
LOC106915336	ZN235_HUMAN	Zinc finger protein 235
pcdh15	PCD15_HUMAN	Protocadherin-15
kcnj4	KCJ12_HUMAN	ATP-sensitive inward rectifier potassium channel 12
LOC106915606	PDE6B_HUMAN	Rod cGMP-specific 3',5'-cyclic phosphodiesterase subunit beta
nnt	NNTM_HUMAN	NAD(P) transhydrogenase, mitochondrial
rcan3	RCAN3_HUMAN	Calcipressin-3
LOC106915801	RD3_HUMAN	Protein RD3
cacna1f	CAC1F_HUMAN	Voltage-dependent L-type calcium channel subunit alpha-1F
LOC106916117	RIMS2_HUMAN	Regulating synaptic membrane exocytosis protein 2
LOC106916244	MPDZ_HUMAN	Multiple PDZ domain protein
LOC106916330	GNAT1_HUMAN	Guanine nucleotide-binding protein G(t) subunit alpha-1
LOC106916562	CX6B1_HUMAN	Cytochrome c oxidase subunit 6B1
brd1	BRD1_HUMAN	Bromodomain-containing protein 1
LOC106916757	AHR_HUMAN	Aryl hydrocarbon receptor
LOC106916790	OPN4_HUMAN	Melanopsin
LOC106917001	RSF1_HUMAN	Remodeling and spacing factor 1
LOC106917060	ELOV4_HUMAN	Elongation of very long chain fatty acids protein 4
LOC106917154	ARRC_HUMAN	Arrestin-C
kif21b	KI21B_HUMAN	Kinesin-like protein KIF21B
LOC106917465	OTX2_HUMAN	Homeobox protein OTX2
cdk14	CDK14_HUMAN	Cyclin-dependent kinase 14
sh2b2	SH2B2_HUMAN	SH2B adapter protein 2
mapk10	MK10_HUMAN	Mitogen-activated protein kinase 10
usp47	UBP47_HUMAN	Ubiquitin carboxyl-terminal hydrolase 47
guca1b	GUC1B_HUMAN	Guanylyl cyclase-activating protein 2
pik3ip1	P3IP1_HUMAN	Phosphoinositide-3-kinase-interacting protein 1
LOC106918407	OPSD_HUMAN	Rhodopsin
LOC106918408	OPSD_HUMAN	Rhodopsin
cplx4	CPLX4_HUMAN	Complexin-4
hopx	HOP_HUMAN	Homeodomain-only protein
LOC106919221	KERA_HUMAN	Keratocan
LOC106919280	SPRL1_HUMAN	SPARC-like protein 1
LOC106919502	GBG1_HUMAN	Guanine nucleotide-binding protein G(T) subunit gamma-T1
LOC106919585	PTPR2_HUMAN	Receptor-type tyrosine-protein phosphatase N2
LOC106919748	NPTX2_HUMAN	Neuronal pentraxin-2
LOC106920158	SNP25_HUMAN	Synaptosomal-associated protein 25
LOC106919898	GBB3_HUMAN	Guanine nucleotide-binding protein G(I)/G(S)/G(T) subunit beta-3
LOC106920190	PHOS_HUMAN	Phosducin
rgs9bp	R9BP_HUMAN	Regulator of G-protein signaling 9-binding protein
LOC106920547	PCBP3_HUMAN	Poly(rC)-binding protein 3
tprn	TPRN_HUMAN	Taperin
fau	UBIM_HUMAN	Ubiquitin-like protein FUBI
wisp1	WISP1_HUMAN	WNT1-inducible-signaling pathway protein 1
LOC106921246	ES1_HUMAN	ES1 protein homolog, mitochondrial
LOC106921390	LZTS1_HUMAN	Leucine zipper putative tumor suppressor 1
